# Supplementary material
Source: PubMed Central journal article supplement (PMC10992537)
Supplement: 262_2020_2813_MOESM1_ESM.pdf [file 262_2020_2813_MOESM1_ESM.pdf]

| Variable           | Coordinates of ROC curve |             |                 |             |                           |        |
|--------------------|--------------------------|-------------|-----------------|-------------|---------------------------|--------|
|                    | positive if ≥            | sensitivity | 1 - specificity | specificity | sensitivity + specificity | Youden |
| Overall CD3+ TIL   | -0,5000                  | 1,000       | 1,000           | 0,000       | 1,000                     | 0,000  |
|                    | 0,6250                   | 0,967       | 0,948           | 0,052       | 1,018                     | 0,018  |
|                    | 0,8750                   | 0,900       | 0,866           | 0,134       | 1,034                     | 0,034  |
|                    | 1,1250                   | 0,867       | 0,835           | 0,165       | 1,032                     | 0,032  |
|                    | 1,3750                   | 0,833       | 0,814           | 0,186       | 1,019                     | 0,019  |
|                    | 1,6250                   | 0,833       | 0,794           | 0,206       | 1,040                     | 0,040  |
|                    | 1,8750                   | 0,800       | 0,784           | 0,216       | 1,016                     | 0,016  |
|                    | 2,2500                   | 0,733       | 0,753           | 0,247       | 0,981                     | -0,019 |
|                    | 2,6250                   | 0,733       | 0,742           | 0,258       | 0,991                     | -0,009 |
|                    | 2,8750                   | 0,700       | 0,742           | 0,258       | 0,958                     | -0,042 |
|                    | 3,2500                   | 0,633       | 0,701           | 0,299       | 0,932                     | -0,068 |
|                    | 3,6250                   | 0,633       | 0,670           | 0,330       | 0,963                     | -0,037 |
|                    | 3,8750                   | 0,633       | 0,649           | 0,351       | 0,984                     | -0,016 |
|                    | 4,2500                   | 0,600       | 0,619           | 0,381       | 0,981                     | -0,019 |
|                    | 4,7500                   | 0,600       | 0,598           | 0,402       | 1,002                     | 0,002  |
|                    | 5,2500                   | 0,600       | 0,546           | 0,454       | 1,054                     | 0,054  |
|                    | 5,7500                   | 0,600       | 0,536           | 0,464       | 1,064                     | 0,064  |
|                    | 6,2500                   | 0,600       | 0,474           | 0,526       | 1,126                     | 0,126  |
|                    | 6,7500                   | 0,567       | 0,474           | 0,526       | 1,092                     | 0,092  |
|                    | 7,2500                   | 0,567       | 0,433           | 0,567       | 1,134                     | 0,134  |
|                    | 7,6250                   | 0,500       | 0,402           | 0,598       | 1,098                     | 0,098  |
|                    | 8,1250                   | 0,500       | 0,392           | 0,608       | 1,108                     | 0,108  |
|                    | 8,7500                   | 0,500       | 0,361           | 0,639       | 1,139                     | 0,139  |
|                    | 9,5000                   | 0,500       | 0,351           | 0,649       | 1,149                     | 0,149  |
|                    | 10,1250                  | 0,467       | 0,320           | 0,680       | 1,147                     | 0,147  |
|                    | 10,6250                  | 0,433       | 0,320           | 0,680       | 1,114                     | 0,114  |
|                    | 11,7500                  | 0,400       | 0,309           | 0,691       | 1,091                     | 0,091  |
|                    | 13,7500                  | 0,367       | 0,299           | 0,701       | 1,068                     | 0,068  |
|                    | 15,5000                  | 0,300       | 0,237           | 0,763       | 1,063                     | 0,063  |
|                    | 16,7500                  | 0,267       | 0,237           | 0,763       | 1,030                     | 0,030  |
|                    | 18,7500                  | 0,233       | 0,237           | 0,763       | 0,996                     | -0,004 |
|                    | 21,2500                  | 0,133       | 0,196           | 0,804       | 0,937                     | -0,063 |
|                    | 23,7500                  | 0,067       | 0,186           | 0,814       | 0,881                     | -0,119 |
|                    | 26,2500                  | 0,067       | 0,144           | 0,856       | 0,922                     | -0,078 |
|                    | 28,7500                  | 0,033       | 0,113           | 0,887       | 0,920                     | -0,080 |
|                    | 31,2500                  | 0,000       | 0,103           | 0,897       | 0,897                     | -0,103 |
|                    | 33,7500                  | 0,000       | 0,082           | 0,918       | 0,918                     | -0,082 |
|                    | 36,2500                  | 0,000       | 0,072           | 0,928       | 0,928                     | -0,072 |
|                    | 38,7500                  | 0,000       | 0,062           | 0,938       | 0,938                     | -0,062 |
|                    | 43,7500                  | 0,000       | 0,052           | 0,948       | 0,948                     | -0,052 |
|                    | 48,7500                  | 0,000       | 0,041           | 0,959       | 0,959                     | -0,041 |
|                    | 52,5000                  | 0,000       | 0,031           | 0,969       | 0,969                     | -0,031 |
|                    | 60,0000                  | 0,000       | 0,021           | 0,979       | 0,979                     | -0,021 |
| 67,5000            | 0,000                    | 0,010       | 0,990           | 0,990       | -0,010                    |        |
| 71,0000            | 0,000                    | 0,000       | 1,000           | 1,000       | 0,000                     |        |
| Overall CD8+ TIL   | -1,0000                  | 1,000       | 1,000           | 0,000       | 1,000                     | 0,000  |
|                    | 0,1250                   | 0,967       | 0,969           | 0,031       | 0,998                     | -0,002 |
|                    | 0,3750                   | 0,967       | 0,959           | 0,041       | 1,008                     | 0,008  |
|                    | 0,6250                   | 0,900       | 0,856           | 0,144       | 1,044                     | 0,044  |
|                    | 0,8750                   | 0,867       | 0,794           | 0,206       | 1,073                     | 0,073  |
|                    | 1,1250                   | 0,800       | 0,722           | 0,278       | 1,078                     | 0,078  |
|                    | 1,3750                   | 0,767       | 0,701           | 0,299       | 1,066                     | 0,066  |
|                    | 1,6250                   | 0,767       | 0,660           | 0,340       | 1,107                     | 0,107  |
|                    | 1,8750                   | 0,767       | 0,639           | 0,361       | 1,127                     | 0,127  |
|                    | 2,2500                   | 0,767       | 0,546           | 0,454       | 1,220                     | 0,220  |
|                    | 2,6250                   | 0,600       | 0,546           | 0,454       | 1,054                     | 0,054  |
|                    | 2,8750                   | 0,600       | 0,536           | 0,464       | 1,064                     | 0,064  |
|                    | 3,2500                   | 0,600       | 0,505           | 0,495       | 1,095                     | 0,095  |
|                    | 3,6250                   | 0,600       | 0,464           | 0,536       | 1,136                     | 0,136  |
|                    | 3,8750                   | 0,533       | 0,464           | 0,536       | 1,069                     | 0,069  |
|                    | 4,5000                   | 0,467       | 0,412           | 0,588       | 1,054                     | 0,054  |
|                    | 5,1250                   | 0,467       | 0,381           | 0,619       | 1,085                     | 0,085  |
|                    | 5,3750                   | 0,433       | 0,371           | 0,629       | 1,062                     | 0,062  |
|                    | 5,7500                   | 0,400       | 0,371           | 0,629       | 1,029                     | 0,029  |
|                    | 6,5000                   | 0,367       | 0,361           | 0,639       | 1,006                     | 0,006  |
|                    | 7,7500                   | 0,300       | 0,320           | 0,680       | 0,980                     | -0,020 |
|                    | 9,2500                   | 0,300       | 0,299           | 0,701       | 1,001                     | 0,001  |
|                    | 10,5000                  | 0,233       | 0,289           | 0,711       | 0,945                     | -0,055 |
|                    | 11,7500                  | 0,200       | 0,278           | 0,722       | 0,922                     | -0,078 |
|                    | 13,0000                  | 0,167       | 0,268           | 0,732       | 0,899                     | -0,101 |
|                    | 14,2500                  | 0,167       | 0,247           | 0,753       | 0,919                     | -0,081 |
|                    | 15,5000                  | 0,100       | 0,196           | 0,804       | 0,904                     | -0,096 |
|                    | 16,7500                  | 0,100       | 0,175           | 0,825       | 0,925                     | -0,075 |
|                    | 18,7500                  | 0,100       | 0,165           | 0,835       | 0,935                     | -0,065 |
|                    | 21,2500                  | 0,033       | 0,144           | 0,856       | 0,889                     | -0,111 |
|                    | 23,7500                  | 0,000       | 0,103           | 0,897       | 0,897                     | -0,103 |
|                    | 27,5000                  | 0,000       | 0,052           | 0,948       | 0,948                     | -0,052 |
|                    | 31,2500                  | 0,000       | 0,041           | 0,959       | 0,959                     | -0,041 |
| 36,2500            | 0,000                    | 0,031       | 0,969           | 0,969       | -0,031                    |        |
| 47,5000            | 0,000                    | 0,021       | 0,979           | 0,979       | -0,021                    |        |
| 56,0000            | 0,000                    | 0,000       | 1,000           | 1,000       | 0,000                     |        |
| Overall FoxP3+ TIL | -1,0000                  | 1,000       | 1,000           | 0,000       | 1,000                     | 0,000  |
|                    | 0,1250                   | 0,933       | 0,979           | 0,021       | 0,954                     | -0,046 |
|                    | 0,3750                   | 0,900       | 0,928           | 0,072       | 0,972                     | -0,028 |
|                    | 0,6250                   | 0,700       | 0,732           | 0,268       | 0,968                     | -0,032 |
|                    | 0,8750                   | 0,667       | 0,629           | 0,371       | 1,038                     | 0,038  |
|                    | 1,1250                   | 0,600       | 0,546           | 0,454       | 1,054                     | 0,054  |
|                    | 1,3750                   | 0,500       | 0,505           | 0,495       | 0,995                     | -0,005 |
|                    | 1,6250                   | 0,433       | 0,495           | 0,505       | 0,938                     | -0,062 |
|                    | 1,8750                   | 0,433       | 0,464           | 0,536       | 0,969                     | -0,031 |
|                    | 2,2500                   | 0,367       | 0,381           | 0,619       | 0,985                     | -0,015 |
|                    | 2,7500                   | 0,333       | 0,330           | 0,670       | 1,003                     | 0,003  |
|                    | 3,2500                   | 0,267       | 0,237           | 0,763       | 1,030                     | 0,030  |
|                    | 3,7500                   | 0,267       | 0,196           | 0,804       | 1,071                     | 0,071  |
|                    | 4,2500                   | 0,200       | 0,155           | 0,845       | 1,045                     | 0,045  |
|                    | 4,7500                   | 0,200       | 0,134           | 0,866       | 1,066                     | 0,066  |
|                    | 5,5000                   | 0,133       | 0,082           | 0,918       | 1,051                     | 0,051  |
|                    | 6,2500                   | 0,100       | 0,062           | 0,938       | 1,038                     | 0,038  |
|                    | 6,7500                   | 0,067       | 0,062           | 0,938       | 1,005                     | 0,005  |
|                    | 7,2500                   | 0,067       | 0,052           | 0,948       | 1,015                     | 0,015  |
|                    | 8,0000                   | 0,033       | 0,052           | 0,948       | 0,982                     | -0,018 |
| 9,2500             | 0,033                    | 0,031       | 0,969           | 1,002       | 0,002                     |        |
| 11,2500            | 0,000                    | 0,031       | 0,969           | 0,969       | -0,031                    |        |
| 13,7500            | 0,000                    | 0,021       | 0,979           | 0,979       | -0,021                    |        |
| 20,0000            | 0,000                    | 0,010       | 0,990           | 0,990       | -0,010                    |        |
| 26,0000            | 0,000                    | 0,000       | 1,000           | 1,000       | 0,000                     |        |
| stromal CD3+ TIL   | -0,5000                  | 1,000       | 1,000           | 0,000       | 1,000                     | 0,000  |
|                    | 0,6250                   | 0,971       | 0,944           | 0,056       | 1,026                     | 0,026  |
|                    | 0,8750                   | 0,941       | 0,944           | 0,056       | 0,997                     | -0,003 |

|                     |         |       |       |       |       |        |
|---------------------|---------|-------|-------|-------|-------|--------|
|                     | 1,1250  | 0,941 | 0,935 | 0,065 | 1,006 | 0,006  |
|                     | 1,3750  | 0,941 | 0,926 | 0,074 | 1,015 | 0,015  |
|                     | 2,1250  | 0,941 | 0,917 | 0,083 | 1,025 | 0,025  |
|                     | 2,8750  | 0,941 | 0,889 | 0,111 | 1,052 | 0,052  |
|                     | 3,5000  | 0,912 | 0,880 | 0,120 | 1,032 | 0,032  |
|                     | 4,2500  | 0,912 | 0,861 | 0,139 | 1,051 | 0,051  |
|                     | 4,7500  | 0,912 | 0,852 | 0,148 | 1,060 | 0,060  |
|                     | 5,1250  | 0,853 | 0,833 | 0,167 | 1,020 | 0,020  |
|                     | 5,6250  | 0,853 | 0,824 | 0,176 | 1,029 | 0,029  |
|                     | 6,2500  | 0,853 | 0,815 | 0,185 | 1,038 | 0,038  |
|                     | 6,7500  | 0,824 | 0,815 | 0,185 | 1,009 | 0,009  |
|                     | 7,2500  | 0,794 | 0,778 | 0,222 | 1,016 | 0,016  |
|                     | 8,0000  | 0,794 | 0,769 | 0,231 | 1,026 | 0,026  |
|                     | 8,7500  | 0,794 | 0,741 | 0,259 | 1,053 | 0,053  |
|                     | 9,5000  | 0,765 | 0,741 | 0,259 | 1,024 | 0,024  |
|                     | 10,7500 | 0,706 | 0,731 | 0,269 | 0,974 | -0,026 |
|                     | 12,0000 | 0,706 | 0,722 | 0,278 | 0,984 | -0,016 |
|                     | 13,7500 | 0,706 | 0,685 | 0,315 | 1,021 | 0,021  |
|                     | 15,1250 | 0,706 | 0,667 | 0,333 | 1,039 | 0,039  |
|                     | 15,6250 | 0,706 | 0,657 | 0,343 | 1,048 | 0,048  |
|                     | 16,7500 | 0,706 | 0,648 | 0,352 | 1,058 | 0,058  |
|                     | 18,7500 | 0,706 | 0,630 | 0,370 | 1,076 | 0,076  |
|                     | 20,5000 | 0,706 | 0,602 | 0,398 | 1,104 | 0,104  |
|                     | 21,2500 | 0,706 | 0,593 | 0,407 | 1,113 | 0,113  |
|                     | 22,0000 | 0,706 | 0,574 | 0,426 | 1,132 | 0,132  |
|                     | 23,0000 | 0,647 | 0,556 | 0,444 | 1,092 | 0,092  |
|                     | 24,2500 | 0,647 | 0,537 | 0,463 | 1,110 | 0,110  |
|                     | 25,1250 | 0,647 | 0,528 | 0,472 | 1,119 | 0,119  |
|                     | 25,3750 | 0,588 | 0,519 | 0,481 | 1,070 | 0,070  |
|                     | 26,0000 | 0,588 | 0,509 | 0,491 | 1,079 | 0,079  |
|                     | 27,0000 | 0,588 | 0,500 | 0,500 | 1,088 | 0,088  |
|                     | 28,0000 | 0,588 | 0,472 | 0,528 | 1,116 | 0,116  |
|                     | 29,2500 | 0,559 | 0,472 | 0,528 | 1,087 | 0,087  |
|                     | 32,5000 | 0,441 | 0,463 | 0,537 | 0,978 | -0,022 |
|                     | 36,2500 | 0,412 | 0,435 | 0,565 | 0,977 | -0,023 |
|                     | 38,0000 | 0,382 | 0,417 | 0,583 | 0,966 | -0,034 |
|                     | 39,2500 | 0,382 | 0,407 | 0,593 | 0,975 | -0,025 |
|                     | 41,2500 | 0,324 | 0,343 | 0,657 | 0,981 | -0,019 |
|                     | 43,7500 | 0,324 | 0,333 | 0,667 | 0,990 | -0,010 |
|                     | 46,2500 | 0,265 | 0,315 | 0,685 | 0,950 | -0,050 |
|                     | 48,7500 | 0,265 | 0,296 | 0,704 | 0,968 | -0,032 |
|                     | 52,5000 | 0,206 | 0,222 | 0,778 | 0,984 | -0,016 |
|                     | 56,2500 | 0,176 | 0,213 | 0,787 | 0,964 | -0,036 |
|                     | 58,7500 | 0,176 | 0,204 | 0,796 | 0,973 | -0,027 |
|                     | 62,5000 | 0,118 | 0,167 | 0,833 | 0,951 | -0,049 |
|                     | 67,5000 | 0,118 | 0,130 | 0,870 | 0,988 | -0,012 |
|                     | 72,5000 | 0,088 | 0,102 | 0,898 | 0,986 | -0,014 |
|                     | 77,5000 | 0,029 | 0,074 | 0,926 | 0,955 | -0,045 |
|                     | 83,7500 | 0,000 | 0,028 | 0,972 | 0,972 | -0,028 |
|                     | 88,7500 | 0,000 | 0,019 | 0,981 | 0,981 | -0,019 |
|                     | 92,5000 | 0,000 | 0,009 | 0,991 | 0,991 | -0,009 |
|                     | 96,0000 | 0,000 | 0,000 | 1,000 | 1,000 | 0,000  |
| epithelial CD3+ TIL | -0,5000 | 1,000 | 1,000 | 0,000 | 1,000 | 0,000  |
|                     | 0,7500  | 0,971 | 0,981 | 0,019 | 0,989 | -0,011 |
|                     | 1,2500  | 0,912 | 0,870 | 0,130 | 1,041 | 0,041  |
|                     | 1,7500  | 0,882 | 0,759 | 0,241 | 1,123 | 0,123  |
|                     | 2,2500  | 0,765 | 0,667 | 0,333 | 1,098 | 0,098  |
|                     | 2,7500  | 0,676 | 0,620 | 0,380 | 1,056 | 0,056  |
|                     | 3,2500  | 0,618 | 0,556 | 0,444 | 1,062 | 0,062  |
|                     | 3,7500  | 0,588 | 0,546 | 0,454 | 1,042 | 0,042  |
|                     | 4,2500  | 0,500 | 0,500 | 0,500 | 1,000 | 0,000  |
|                     | 4,7500  | 0,500 | 0,481 | 0,519 | 1,019 | 0,019  |
|                     | 5,2500  | 0,500 | 0,426 | 0,574 | 1,074 | 0,074  |
|                     | 5,7500  | 0,471 | 0,407 | 0,593 | 1,063 | 0,063  |
|                     | 6,2500  | 0,441 | 0,352 | 0,648 | 1,089 | 0,089  |
|                     | 6,7500  | 0,441 | 0,343 | 0,657 | 1,099 | 0,099  |
|                     | 7,2500  | 0,382 | 0,315 | 0,685 | 1,068 | 0,068  |
|                     | 7,7500  | 0,353 | 0,278 | 0,722 | 1,075 | 0,075  |
|                     | 8,2500  | 0,353 | 0,241 | 0,759 | 1,112 | 0,112  |
|                     | 8,7500  | 0,294 | 0,222 | 0,778 | 1,072 | 0,072  |
|                     | 9,5000  | 0,176 | 0,222 | 0,778 | 0,954 | -0,046 |
|                     | 10,2500 | 0,118 | 0,185 | 0,815 | 0,932 | -0,068 |
|                     | 10,7500 | 0,118 | 0,176 | 0,824 | 0,942 | -0,058 |
|                     | 11,5000 | 0,088 | 0,148 | 0,852 | 0,940 | -0,060 |
|                     | 12,5000 | 0,059 | 0,139 | 0,861 | 0,920 | -0,080 |
|                     | 13,5000 | 0,059 | 0,130 | 0,870 | 0,929 | -0,071 |
|                     | 14,2500 | 0,059 | 0,102 | 0,898 | 0,957 | -0,043 |
|                     | 15,2500 | 0,059 | 0,093 | 0,907 | 0,966 | -0,034 |
|                     | 16,7500 | 0,029 | 0,093 | 0,907 | 0,937 | -0,063 |
|                     | 19,0000 | 0,029 | 0,065 | 0,935 | 0,965 | -0,035 |
|                     | 21,2500 | 0,029 | 0,056 | 0,944 | 0,974 | -0,026 |
|                     | 22,7500 | 0,029 | 0,046 | 0,954 | 0,983 | -0,017 |
|                     | 24,0000 | 0,029 | 0,037 | 0,963 | 0,992 | -0,008 |
|                     | 24,7500 | 0,029 | 0,028 | 0,972 | 1,002 | 0,002  |
|                     | 30,5000 | 0,000 | 0,019 | 0,981 | 0,981 | -0,019 |
|                     | 47,7500 | 0,000 | 0,009 | 0,991 | 0,991 | -0,009 |
|                     | 60,5000 | 0,000 | 0,000 | 1,000 | 1,000 | 0,000  |
| stromal CD8+ TIL    | -1,0000 | 1,000 | 1,000 | 0,000 | 1,000 | 0,000  |
|                     | 0,1250  | 0,971 | 0,972 | 0,028 | 0,998 | -0,002 |
|                     | 0,3750  | 0,971 | 0,954 | 0,046 | 1,017 | 0,017  |
|                     | 0,6250  | 0,912 | 0,880 | 0,120 | 1,032 | 0,032  |
|                     | 0,8750  | 0,912 | 0,861 | 0,139 | 1,051 | 0,051  |
|                     | 1,1250  | 0,882 | 0,843 | 0,157 | 1,040 | 0,040  |
|                     | 1,3750  | 0,853 | 0,824 | 0,176 | 1,029 | 0,029  |
|                     | 1,6250  | 0,853 | 0,815 | 0,185 | 1,038 | 0,038  |
|                     | 1,8750  | 0,853 | 0,806 | 0,194 | 1,047 | 0,047  |
|                     | 2,2500  | 0,853 | 0,713 | 0,287 | 1,140 | 0,140  |
|                     | 2,7500  | 0,853 | 0,685 | 0,315 | 1,168 | 0,168  |
|                     | 3,5000  | 0,735 | 0,620 | 0,380 | 1,115 | 0,115  |
|                     | 4,5000  | 0,706 | 0,593 | 0,407 | 1,113 | 0,113  |
|                     | 5,1250  | 0,618 | 0,556 | 0,444 | 1,062 | 0,062  |
|                     | 5,6250  | 0,618 | 0,546 | 0,454 | 1,071 | 0,071  |
|                     | 6,2500  | 0,618 | 0,537 | 0,463 | 1,081 | 0,081  |
|                     | 6,7500  | 0,588 | 0,509 | 0,491 | 1,079 | 0,079  |
|                     | 7,2500  | 0,588 | 0,491 | 0,509 | 1,097 | 0,097  |
|                     | 7,6250  | 0,559 | 0,472 | 0,528 | 1,087 | 0,087  |
|                     | 7,8750  | 0,559 | 0,463 | 0,537 | 1,096 | 0,096  |
|                     | 8,5000  | 0,559 | 0,454 | 0,546 | 1,105 | 0,105  |
|                     | 9,5000  | 0,559 | 0,435 | 0,565 | 1,124 | 0,124  |
|                     | 10,1250 | 0,529 | 0,407 | 0,593 | 1,122 | 0,122  |
|                     | 10,8750 | 0,500 | 0,398 | 0,602 | 1,102 | 0,102  |
|                     | 12,0000 | 0,471 | 0,398 | 0,602 | 1,072 | 0,072  |

|                       |         |       |       |       |       |        |
|-----------------------|---------|-------|-------|-------|-------|--------|
|                       | 13,0000 | 0,471 | 0,389 | 0,611 | 1,082 | 0,082  |
|                       | 14,2500 | 0,412 | 0,380 | 0,620 | 1,032 | 0,032  |
|                       | 15,1250 | 0,353 | 0,370 | 0,630 | 0,983 | -0,017 |
|                       | 15,8750 | 0,353 | 0,361 | 0,639 | 0,992 | -0,008 |
|                       | 17,0000 | 0,324 | 0,361 | 0,639 | 0,962 | -0,038 |
|                       | 18,7500 | 0,294 | 0,343 | 0,657 | 0,952 | -0,048 |
|                       | 20,7500 | 0,235 | 0,324 | 0,676 | 0,911 | -0,089 |
|                       | 22,0000 | 0,235 | 0,315 | 0,685 | 0,920 | -0,080 |
|                       | 23,0000 | 0,235 | 0,306 | 0,694 | 0,930 | -0,070 |
|                       | 24,2500 | 0,235 | 0,296 | 0,704 | 0,939 | -0,061 |
|                       | 27,5000 | 0,206 | 0,241 | 0,759 | 0,965 | -0,035 |
|                       | 31,7500 | 0,176 | 0,231 | 0,769 | 0,945 | -0,055 |
|                       | 34,2500 | 0,176 | 0,222 | 0,778 | 0,954 | -0,046 |
|                       | 37,5000 | 0,176 | 0,148 | 0,852 | 1,028 | 0,028  |
|                       | 41,2500 | 0,118 | 0,102 | 0,898 | 1,016 | 0,016  |
|                       | 43,7500 | 0,118 | 0,093 | 0,907 | 1,025 | 0,025  |
|                       | 47,5000 | 0,088 | 0,093 | 0,907 | 0,996 | -0,004 |
|                       | 52,5000 | 0,029 | 0,056 | 0,944 | 0,974 | -0,026 |
|                       | 57,5000 | 0,000 | 0,046 | 0,954 | 0,954 | -0,046 |
|                       | 62,5000 | 0,000 | 0,037 | 0,963 | 0,963 | -0,037 |
|                       | 70,0000 | 0,000 | 0,019 | 0,981 | 0,981 | -0,019 |
|                       | 76,0000 | 0,000 | 0,000 | 1,000 | 1,000 | 0,000  |
| epithelial CD8+ TIL   | -1,0000 | 1,000 | 1,000 | 0,000 | 1,000 | 0,000  |
|                       | 0,2500  | 0,941 | 0,954 | 0,046 | 0,987 | -0,013 |
|                       | 0,7500  | 0,882 | 0,917 | 0,083 | 0,966 | -0,034 |
|                       | 1,2500  | 0,735 | 0,806 | 0,194 | 0,930 | -0,070 |
|                       | 1,7500  | 0,676 | 0,704 | 0,296 | 0,973 | -0,027 |
|                       | 2,2500  | 0,676 | 0,639 | 0,361 | 1,038 | 0,038  |
|                       | 2,7500  | 0,647 | 0,602 | 0,398 | 1,045 | 0,045  |
|                       | 3,2500  | 0,500 | 0,546 | 0,454 | 0,954 | -0,046 |
|                       | 3,7500  | 0,441 | 0,519 | 0,481 | 0,923 | -0,077 |
|                       | 4,2500  | 0,441 | 0,435 | 0,565 | 1,006 | 0,006  |
|                       | 4,7500  | 0,324 | 0,398 | 0,602 | 0,925 | -0,075 |
|                       | 5,2500  | 0,294 | 0,343 | 0,657 | 0,952 | -0,048 |
|                       | 5,7500  | 0,294 | 0,324 | 0,676 | 0,970 | -0,030 |
|                       | 6,2500  | 0,235 | 0,287 | 0,713 | 0,948 | -0,052 |
|                       | 6,7500  | 0,206 | 0,269 | 0,731 | 0,937 | -0,063 |
|                       | 7,2500  | 0,176 | 0,250 | 0,750 | 0,926 | -0,074 |
|                       | 7,7500  | 0,176 | 0,231 | 0,769 | 0,945 | -0,055 |
|                       | 8,2500  | 0,176 | 0,213 | 0,787 | 0,964 | -0,036 |
|                       | 8,7500  | 0,147 | 0,194 | 0,806 | 0,953 | -0,047 |
|                       | 9,5000  | 0,147 | 0,185 | 0,815 | 0,962 | -0,038 |
|                       | 10,2500 | 0,147 | 0,157 | 0,843 | 0,990 | -0,010 |
|                       | 10,7500 | 0,118 | 0,157 | 0,843 | 0,960 | -0,040 |
|                       | 11,5000 | 0,088 | 0,148 | 0,852 | 0,940 | -0,060 |
|                       | 12,2500 | 0,059 | 0,130 | 0,870 | 0,929 | -0,071 |
|                       | 12,7500 | 0,059 | 0,120 | 0,880 | 0,938 | -0,062 |
|                       | 13,2500 | 0,059 | 0,111 | 0,889 | 0,948 | -0,052 |
|                       | 13,7500 | 0,059 | 0,102 | 0,898 | 0,957 | -0,043 |
|                       | 14,2500 | 0,059 | 0,093 | 0,907 | 0,966 | -0,034 |
|                       | 14,7500 | 0,059 | 0,083 | 0,917 | 0,975 | -0,025 |
|                       | 15,7500 | 0,029 | 0,074 | 0,926 | 0,955 | -0,045 |
|                       | 16,7500 | 0,029 | 0,065 | 0,935 | 0,965 | -0,035 |
|                       | 17,5000 | 0,029 | 0,056 | 0,944 | 0,974 | -0,026 |
|                       | 19,7500 | 0,029 | 0,046 | 0,954 | 0,983 | -0,017 |
|                       | 21,7500 | 0,029 | 0,037 | 0,963 | 0,992 | -0,008 |
|                       | 22,2500 | 0,029 | 0,028 | 0,972 | 1,002 | 0,002  |
|                       | 23,0000 | 0,029 | 0,019 | 0,981 | 1,011 | 0,011  |
|                       | 24,2500 | 0,029 | 0,009 | 0,991 | 1,020 | 0,020  |
|                       | 25,5000 | 0,000 | 0,009 | 0,991 | 0,991 | -0,009 |
|                       | 27,0000 | 0,000 | 0,000 | 1,000 | 1,000 | 0,000  |
| stromal FoxP3+ TIL    | -1,0000 | 1,000 | 1,000 | 0,000 | 1,000 | 0,000  |
|                       | 0,1250  | 0,882 | 0,953 | 0,047 | 0,929 | -0,071 |
|                       | 0,3750  | 0,853 | 0,925 | 0,075 | 0,928 | -0,072 |
|                       | 0,6250  | 0,794 | 0,804 | 0,196 | 0,990 | -0,010 |
|                       | 0,8750  | 0,765 | 0,776 | 0,224 | 0,989 | -0,011 |
|                       | 1,1250  | 0,735 | 0,738 | 0,262 | 0,997 | -0,003 |
|                       | 1,3750  | 0,676 | 0,673 | 0,327 | 1,004 | 0,004  |
|                       | 1,6250  | 0,676 | 0,636 | 0,364 | 1,041 | 0,041  |
|                       | 1,8750  | 0,647 | 0,617 | 0,383 | 1,030 | 0,030  |
|                       | 2,2500  | 0,559 | 0,561 | 0,439 | 0,998 | -0,002 |
|                       | 2,6250  | 0,529 | 0,533 | 0,467 | 0,997 | -0,003 |
|                       | 2,8750  | 0,529 | 0,514 | 0,486 | 1,015 | 0,015  |
|                       | 3,2500  | 0,441 | 0,486 | 0,514 | 0,955 | -0,045 |
|                       | 3,6250  | 0,412 | 0,477 | 0,523 | 0,935 | -0,065 |
|                       | 3,8750  | 0,412 | 0,467 | 0,533 | 0,944 | -0,056 |
|                       | 4,5000  | 0,382 | 0,411 | 0,589 | 0,971 | -0,029 |
|                       | 5,5000  | 0,324 | 0,299 | 0,701 | 1,024 | 0,024  |
|                       | 6,5000  | 0,324 | 0,252 | 0,748 | 1,071 | 0,071  |
|                       | 7,2500  | 0,324 | 0,215 | 0,785 | 1,109 | 0,109  |
|                       | 8,0000  | 0,324 | 0,168 | 0,832 | 1,155 | 0,155  |
|                       | 8,7500  | 0,265 | 0,159 | 0,841 | 1,106 | 0,106  |
|                       | 9,5000  | 0,265 | 0,150 | 0,850 | 1,115 | 0,115  |
|                       | 10,5000 | 0,206 | 0,121 | 0,879 | 1,084 | 0,084  |
|                       | 11,7500 | 0,206 | 0,103 | 0,897 | 1,103 | 0,103  |
|                       | 13,0000 | 0,147 | 0,093 | 0,907 | 1,054 | 0,054  |
|                       | 14,2500 | 0,147 | 0,084 | 0,916 | 1,063 | 0,063  |
|                       | 15,1250 | 0,118 | 0,047 | 0,953 | 1,071 | 0,071  |
|                       | 16,3750 | 0,118 | 0,037 | 0,963 | 1,080 | 0,080  |
|                       | 18,0000 | 0,088 | 0,037 | 0,963 | 1,051 | 0,051  |
|                       | 19,2500 | 0,088 | 0,028 | 0,972 | 1,060 | 0,060  |
|                       | 22,6250 | 0,029 | 0,019 | 0,981 | 1,011 | 0,011  |
|                       | 27,6250 | 0,029 | 0,009 | 0,991 | 1,020 | 0,020  |
|                       | 32,5000 | 0,000 | 0,009 | 0,991 | 0,991 | -0,009 |
|                       | 36,0000 | 0,000 | 0,000 | 1,000 | 1,000 | 0,000  |
| epithelial FoxP3+ TIL | -1,0000 | 1,000 | 1,000 | 0,000 | 1,000 | 0,000  |
|                       | 0,2500  | 0,853 | 0,860 | 0,140 | 0,993 | -0,007 |
|                       | 0,7500  | 0,706 | 0,766 | 0,234 | 0,940 | -0,060 |
|                       | 1,2500  | 0,382 | 0,439 | 0,561 | 0,943 | -0,057 |
|                       | 1,7500  | 0,235 | 0,252 | 0,748 | 0,983 | -0,017 |
|                       | 2,2500  | 0,147 | 0,159 | 0,841 | 0,988 | -0,012 |
|                       | 2,7500  | 0,118 | 0,075 | 0,925 | 1,043 | 0,043  |
|                       | 3,2500  | 0,088 | 0,056 | 0,944 | 1,032 | 0,032  |
|                       | 3,7500  | 0,088 | 0,037 | 0,963 | 1,051 | 0,051  |
|                       | 5,0000  | 0,088 | 0,019 | 0,981 | 1,070 | 0,070  |
|                       | 6,2500  | 0,059 | 0,000 | 1,000 | 1,059 | 0,059  |
|                       | 7,5000  | 0,029 | 0,000 | 1,000 | 1,029 | 0,029  |
|                       | 9,5000  | 0,000 | 0,000 | 1,000 | 1,000 | 0,000  |

Supplementary Table 1: Calculation of Youden index by ROC analysis

| Exon 9   |         | Exon 11   |         | Exon 14   |         |
|----------|---------|-----------|---------|-----------|---------|
| c.853T>C | p.F285L | c.1102G>T | p.D368Y | c.1388C>A | p.A463D |
| c.857C>G | p.P286R |           |         | c.1388C>A | p.A463D |
| c.857C>G | p.P286R |           |         |           |         |
| c.857C>G | p.P286R |           |         |           |         |
| c.857C>G | p.P286R |           |         |           |         |

Supplementary Table 2: List of POLE mutations

|                                                                           | Infiltration density / absolute values |        |         |         |
|---------------------------------------------------------------------------|----------------------------------------|--------|---------|---------|
|                                                                           | Mean                                   | Median | Minimum | Maximum |
| overall T-cells (CD3+; % of tumor area)                                   | 10.78                                  | 6.00   | 0.00    | 70.00   |
| epithelial T-cells (CD3+; tumor epithelium; punctum maximum)              | 6.62                                   | 4.28   | 0.00    | 60.00   |
| stromal T-cells (CD3+; % of intratumoral stroma)                          | 32.93                                  | 28.00  | 0.00    | 95.00   |
| overall T-Killer cells (CD8+; % of tumor area)                            | 7.45                                   | 3.25   | 0.00    | 55.00   |
| epithelial T-Killer cells (CD8+; tumor epithelium; punctum maximum)       | 5.38                                   | 3.75   | 0.00    | 26.00   |
| stromal T-Killer cells (CD8+; % of intratumoral stroma)                   | 16.22                                  | 7.50   | 0.00    | 75.00   |
| overall regulatory T-cells (FoxP3+% of tumor area)                        | 2.38                                   | 1.25   | 0.00    | 25.00   |
| epithelial regulatory T-cells (FoxP3+; tumor epithelium; punctum maximum) | 1.40                                   | 1.00   | 0.00    | 9.00    |
| stromal regulatory T-cells (FoxP3+; % of intratumoral stroma)             | 5.14                                   | 3.00   | 0.00    | 35.00   |

Supplementary Table 3: Absolute values (mean; median; range) of infiltration densities of tumor infiltrating lymphocytes

|                                       |      | Grading (WHO) |        |    |        |    |        | Grading (WHO)     |    |                 |    |         |        | p53 status |        | Microsatellite status |        |       |    |                |    | Microsatellite status |       |     |        |          |        | POLE status |       |       |     |        |   |       |       |
|---------------------------------------|------|---------------|--------|----|--------|----|--------|-------------------|----|-----------------|----|---------|--------|------------|--------|-----------------------|--------|-------|----|----------------|----|-----------------------|-------|-----|--------|----------|--------|-------------|-------|-------|-----|--------|---|-------|-------|
|                                       |      | G1            |        | G2 |        | G3 |        | low grade (G1/G2) |    | high grade (G3) |    | mutated |        | wildtype   |        | MSI                   |        | MSS   |    | MLH1/MSH2 loss |    | MSH2/MSH6 loss        |       | MSS |        | wildtype |        | mutated     |       |       |     |        |   |       |       |
|                                       |      | n             | %      | n  | %      | n  | %      | n                 | %  | n               | %  | n       | %      | n          | %      | n                     | %      | n     | %  | n              | %  | n                     | %     | n   | %      | n        | %      | n           | %     |       |     |        |   |       |       |
| stromal TIL (CD3)                     | low  | 23            | 16.20% | 26 | 18.30% | 14 | 9.90%  | 0.005             | 49 | 34.50%          | 14 | 9.90%   | 0.001  | 9          | 6.30%  | 54                    | 38.00% | 0.951 | 13 | 9.20%          | 50 | 35.20%                | 0.002 | 50  | 35.20% | 10       | 7.00%  | 3           | 2.10% | 0.005 | 62  | 43.70% | 1 | 0.70% | 0.100 |
|                                       | high | 22            | 15.50% | 19 | 13.40% | 38 | 26.80% |                   | 41 | 29.90%          | 38 | 26.80%  |        | 11         | 7.70%  | 68                    | 47.90% |       | 36 | 25.40%         | 43 | 30.30%                |       | 43  | 30.30% | 32       | 22.50% | 4           | 2.80% |       | 73  | 51.40% | 6 | 4.20% |       |
| epithelial TIL (CD3)                  | low  | 11            | 7.70%  | 15 | 10.60% | 4  | 2.80%  | 0.007             | 26 | 18.30%          | 4  | 2.80%   | 0.003  | 1          | 0.70%  | 29                    | 20.40% | 0.057 | 5  | 3.50%          | 25 | 17.60%                | 0.021 | 25  | 17.60% | 4        | 2.80%  | 1           | 0.70% | 0.066 | 30  | 21.10% | 0 | 0.00% | 0.160 |
|                                       | high | 34            | 23.90% | 30 | 21.10% | 48 | 33.80% |                   | 64 | 45.10%          | 48 | 33.80%  |        | 19         | 13.40% | 93                    | 65.50% |       | 64 | 45.10%         | 68 | 47.90%                |       | 68  | 47.90% | 38       | 26.80% | 6           | 4.20% |       | 105 | 73.90% | 7 | 4.90% |       |
| stromal T-Killer cells (CD8)          | low  | 18            | 12.70% | 18 | 12.70% | 3  | 2.10%  | <0.001            | 36 | 25.40%          | 3  | 2.10%   | <0.001 | 6          | 4.20%  | 33                    | 23.20% | 0.784 | 10 | 7.00%          | 29 | 20.40%                | 0.171 | 29  | 20.40% | 6        | 4.20%  | 4           | 2.80% | 0.025 | 37  | 26.10% | 2 | 1.40% | 0.846 |
|                                       | high | 27            | 19.00% | 27 | 19.00% | 49 | 34.50% |                   | 54 | 38.00%          | 49 | 34.50%  |        | 14         | 9.90%  | 89                    | 62.70% |       | 39 | 27.50%         | 64 | 45.10%                |       | 64  | 45.10% | 36       | 25.40% | 3           | 2.10% |       | 98  | 69.00% | 5 | 3.50% |       |
| epithelial T-Killer cells (CD8)       | low  | 23            | 16.20% | 32 | 22.50% | 16 | 11.30% | <0.001            | 55 | 38.70%          | 16 | 11.30%  | <0.001 | 11         | 7.70%  | 60                    | 42.30% | 0.629 | 20 | 14.10%         | 51 | 35.90%                | 0.112 | 51  | 35.90% | 15       | 10.60% | 5           | 3.50% | 0.061 | 70  | 49.30% | 1 | 0.70% | 0.053 |
|                                       | high | 22            | 15.50% | 13 | 9.20%  | 36 | 25.40% |                   | 35 | 24.60%          | 36 | 25.40%  |        | 9          | 6.30%  | 62                    | 43.70% |       | 29 | 20.40%         | 42 | 29.60%                |       | 42  | 29.60% | 27       | 19.00% | 2           | 1.40% |       | 65  | 45.80% | 6 | 4.20% |       |
| stromal regulatory T-cells (FoxP3)    | low  | 43            | 30.30% | 38 | 26.80% | 32 | 22.50% | <0.001            | 81 | 57.00%          | 32 | 22.50%  | <0.001 | 19         | 13.40% | 94                    | 66.20% | 0.065 | 36 | 25.40%         | 77 | 54.20%                | 0.190 | 77  | 54.20% | 29       | 20.40% | 7           | 4.90% | 0.072 | 108 | 76.10% | 5 | 3.50% | 0.583 |
|                                       | high | 2             | 1.40%  | 7  | 4.90%  | 20 | 14.10% |                   | 9  | 6.30%           | 20 | 14.10%  |        | 1          | 0.70%  | 28                    | 19.70% |       | 13 | 9.20%          | 16 | 11.30%                |       | 16  | 11.30% | 13       | 9.20%  | 0           | 0.00% |       | 27  | 19.00% | 2 | 1.40% |       |
| epithelial regulatory T-cells (FoxP3) | low  | 45            | 31.70% | 44 | 31.00% | 48 | 33.80% | 0.104             | 89 | 62.70%          | 48 | 33.80%  | 0.004  | 20         | 14.10% | 117                   | 82.40% | 0.357 | 47 | 33.10%         | 90 | 63.40%                | 0.793 | 90  | 63.40% | 40       | 28.20% | 7           | 4.90% | 0.791 | 131 | 92.30% | 6 | 4.20% | 0.113 |
|                                       | high | 0             | 0.00%  | 1  | 0.70%  | 4  | 2.80%  |                   | 1  | 0.70%           | 4  | 2.80%   |        | 0          | 0.00%  | 5                     | 3.50%  |       | 2  | 1.40%          | 3  | 2.10%                 |       | 3   | 2.10%  | 2        | 1.40%  | 0           | 0.00% |       | 4   | 2.80%  | 1 | 0.70% |       |

Supplementary Table 4: Correlation of immunologic variables (intraepithelial TIL) with morphomolecular data

|                                       |      | Age              |              | T Stage |       |       |    |       |    |       |    |       |   |      |       | N Stage |       |    |      |       |     |       |   |      |       |    |       | M Stage |       |    |       |   |      |       |      |       |      |       |       | FIGO Stage |   |   |   |  |  |  |  |  |  |  |  | FIGO Stage |  |  |  |  |  |  |  |  |  |  |  |
|---------------------------------------|------|------------------|--------------|---------|-------|-------|----|-------|----|-------|----|-------|---|------|-------|---------|-------|----|------|-------|-----|-------|---|------|-------|----|-------|---------|-------|----|-------|---|------|-------|------|-------|------|-------|-------|------------|---|---|---|--|--|--|--|--|--|--|--|------------|--|--|--|--|--|--|--|--|--|--|--|
|                                       |      | median and below | above median | n       | %     | n     | %  | n     | %  | n     | %  | n     | % | n    | %     | n       | %     | n  | %    | n     | %   | n     | % | n    | %     | n  | %     | n       | %     | n  | %     | n | %    | n     | %    | n     | %    | n     | %     | n          | % | n | % |  |  |  |  |  |  |  |  |            |  |  |  |  |  |  |  |  |  |  |  |
| overall TIL (CD3)                     | low  | 47               | 31.0%        | 44      | 31.0% | 0.764 | 68 | 47.9% | 13 | 9.2%  | 9  | 6.3%  | 1 | 0.7% | 0.480 | 87      | 61.3% | 4  | 2.8% | 0.100 | 88  | 62.0% | 3 | 2.1% | 0.230 | 67 | 47.2% | 12      | 8.5%  | 9  | 6.3%  | 3 | 2.1% | 0.537 | 79   | 55.6% | 12   | 8.5%  | 0.192 |            |   |   |   |  |  |  |  |  |  |  |  |            |  |  |  |  |  |  |  |  |  |  |  |
| stromal TIL (CD3)                     | low  | 25               | 17.6%        | 26      | 18.3% | 0.888 | 33 | 23.2% | 11 | 7.7%  | 7  | 4.9%  | 0 | 0.0% | 0.000 | 45      | 31.7% | 6  | 4.2% | 0.773 | 47  | 33.1% | 4 | 2.8% | 0.934 | 33 | 23.2% | 7       | 4.9%  | 7  | 4.9%  | 4 | 2.8% | 0.941 | 40   | 28.2% | 11   | 7.7%  | 0.581 |            |   |   |   |  |  |  |  |  |  |  |  |            |  |  |  |  |  |  |  |  |  |  |  |
| epithelial TIL (CD3)                  | low  | 17               | 26.1%        | 26      | 18.3% | 0.746 | 46 | 32.4% | 10 | 7.0%  | 7  | 4.9%  | 0 | 0.0% | 0.865 | 59      | 41.5% | 4  | 2.8% | 0.090 | 60  | 42.3% | 3 | 2.1% | 0.649 | 45 | 31.7% | 9       | 6.3%  | 6  | 4.2%  | 3 | 2.1% | 0.666 | 54   | 38.0% | 9    | 6.3%  | 0.632 |            |   |   |   |  |  |  |  |  |  |  |  |            |  |  |  |  |  |  |  |  |  |  |  |
| overall T-Killer cells (CD8)          | low  | 35               | 24.4%        | 26      | 18.3% | 0.168 | 48 | 33.8% | 18 | 12.7% | 1  | 0.7%  | 0 | 0.0% | 0.332 | 59      | 41.5% | 2  | 1.4% | 0.128 | 59  | 41.5% | 2 | 1.4% | 0.430 | 48 | 33.8% | 7       | 4.9%  | 4  | 2.8%  | 2 | 1.4% | 0.259 | 55   | 38.7% | 6    | 4.2%  | 0.074 |            |   |   |   |  |  |  |  |  |  |  |  |            |  |  |  |  |  |  |  |  |  |  |  |
| stromal T-Killer cells (CD8)          | low  | 17               | 26.1%        | 44      | 31.0% | 0.019 | 53 | 37.3% | 16 | 11.3% | 1  | 0.7%  | 0 | 0.0% | 0.167 | 73      | 51.4% | 8  | 5.6% | 0.044 | 76  | 53.5% | 5 | 3.5% | 0.423 | 52 | 36.6% | 12      | 8.5%  | 12 | 8.5%  | 5 | 3.5% | 0.155 | 64   | 45.1% | 12   | 8.5%  | 0.091 |            |   |   |   |  |  |  |  |  |  |  |  |            |  |  |  |  |  |  |  |  |  |  |  |
| epithelial T-Killer cells (CD8)       | low  | 26               | 18.3%        | 13      | 9.2%  | 0.737 | 48 | 33.8% | 13 | 9.2%  | 9  | 6.3%  | 1 | 0.7% | 0.645 | 39      | 27.5% | 0  | 0.0% | 0.512 | 38  | 26.8% | 1 | 0.7% | 0.698 | 33 | 23.2% | 3       | 2.1%  | 2  | 1.4%  | 1 | 0.7% | 0.655 | 36   | 25.4% | 3    | 2.1%  | 0.820 |            |   |   |   |  |  |  |  |  |  |  |  |            |  |  |  |  |  |  |  |  |  |  |  |
| overall regulatory T-cells (FoxP3)    | low  | 46               | 32.4%        | 57      | 40.1% | 0.447 | 68 | 47.9% | 21 | 14.8% | 13 | 9.2%  | 1 | 0.7% | 0.185 | 93      | 65.5% | 10 | 7.0% | 0.095 | 97  | 68.3% | 6 | 4.2% | 0.115 | 67 | 47.2% | 16      | 11.3% | 14 | 9.9%  | 6 | 4.2% | 0.203 | 83   | 58.5% | 20   | 14.1% | 0.047 |            |   |   |   |  |  |  |  |  |  |  |  |            |  |  |  |  |  |  |  |  |  |  |  |
| stromal regulatory T-cells (FoxP3)    | low  | 16               | 11.3%        | 12      | 8.5%  | 0.590 | 16 | 11.3% | 6  | 4.2%  | 6  | 4.2%  | 0 | 0.0% | 0.000 | 24      | 16.9% | 4  | 2.8% | 0.973 | 25  | 17.6% | 3 | 2.1% | 0.023 | 16 | 11.3% | 4       | 2.8%  | 5  | 3.5%  | 3 | 2.1% | 0.066 | 20   | 14.1% | 8    | 5.6%  | 0.462 |            |   |   |   |  |  |  |  |  |  |  |  |            |  |  |  |  |  |  |  |  |  |  |  |
| epithelial regulatory T-cells (FoxP3) | low  | 56               | 39.4%        | 57      | 40.1% | 0.626 | 83 | 58.5% | 18 | 12.7% | 11 | 7.7%  | 1 | 0.7% | 0.544 | 105     | 73.9% | 8  | 5.6% | 0.000 | 110 | 77.5% | 3 | 2.1% | 0.023 | 82 | 57.7% | 14      | 9.9%  | 14 | 9.9%  | 3 | 2.1% | 0.066 | 96   | 67.6% | 17   | 12.0% | 0.814 |            |   |   |   |  |  |  |  |  |  |  |  |            |  |  |  |  |  |  |  |  |  |  |  |
|                                       | high | 16               | 11.3%        | 13      | 9.2%  |       | 18 | 12.7% | 6  | 4.2%  | 5  | 3.5%  | 0 | 0.0% |       | 27      | 19.0% | 2  | 1.4% |       | 25  | 17.6% | 4 | 2.8% |       | 18 | 12.7% | 5       | 3.5%  | 2  | 1.4%  | 4 | 2.8% |       | 23   | 16.2% | 6    | 4.2%  |       |            |   |   |   |  |  |  |  |  |  |  |  |            |  |  |  |  |  |  |  |  |  |  |  |
|                                       | low  | 70               | 49.3%        | 67      | 47.2% | 0.626 | 98 | 69.0% | 23 | 16.2% | 15 | 10.6% | 1 | 0.7% | 0.917 | 127     | 89.4% | 10 | 7.0% | 0.532 | 130 | 91.5% | 7 | 4.9% | 0.604 | 97 | 68.3% | 18      | 12.7% | 15 | 10.6% | 7 | 4.9% | 0.836 | 115  | 81.0% | 22   | 15.5% | 0.814 |            |   |   |   |  |  |  |  |  |  |  |  |            |  |  |  |  |  |  |  |  |  |  |  |
|                                       | high | 2                | 1.4%         | 3       | 2.1%  |       | 3  | 2.1%  | 1  | 0.7%  | 1  | 0.7%  | 0 | 0.0% |       | 5       | 3.5%  | 0  | 0.0% |       | 5   | 3.5%  | 0 | 0.0% |       | 3  | 2.1%  | 1       | 0.7%  | 1  | 0.7%  | 0 | 0.0% | 4     | 2.8% | 1     | 0.7% |       |       |            |   |   |   |  |  |  |  |  |  |  |  |            |  |  |  |  |  |  |  |  |  |  |  |

Supplementary Table S1: Correlation of immunologic with clinical data

|                                       |      | Grading (WHO) |        |    |        |    |        | p-value | Grading (WHO) |        |            |        | p-value | p53 status |        |          |        | p-value |
|---------------------------------------|------|---------------|--------|----|--------|----|--------|---------|---------------|--------|------------|--------|---------|------------|--------|----------|--------|---------|
|                                       |      | 1             |        | 2  |        | 3  |        |         | low-grade     |        | high-grade |        |         | mutated    |        | wildtype |        |         |
|                                       |      | n             | %      | n  | %      | n  | %      |         | n             | %      | n          | %      |         | n          | %      | n        | %      |         |
| overall TIL (CD3)                     | low  | 30            | 34,10% | 23 | 26,10% | 11 | 12,50% | <0,001  | 53            | 60,20% | 11         | 12,50% | <0,001  | 9          | 10,20% | 55       | 62,50% | 0,849   |
|                                       | high | 3             | 3,40%  | 6  | 6,80%  | 15 | 17,00% |         | 9             | 10,20% | 15         | 17,00% |         | 3          | 3,40%  | 21       | 23,90% |         |
| stromal TIL (CD3)                     | low  | 21            | 23,90% | 18 | 20,50% | 10 | 11,40% | 0,108   | 39            | 44,30% | 10         | 11,40% | 0,035   | 5          | 5,70%  | 44       | 50,00% | 0,293   |
|                                       | high | 12            | 13,60% | 11 | 12,50% | 16 | 18,20% |         | 23            | 26,10% | 16         | 18,20% |         | 7          | 8,00%  | 32       | 36,40% |         |
| epithelial TIL (CD3)                  | low  | 10            | 11,40% | 11 | 12,50% | 4  | 4,50%  | 0,172   | 21            | 23,90% | 4          | 4,50%  | 0,079   | 0          | 0,00%  | 25       | 28,40% | 0,019   |
|                                       | high | 23            | 26,10% | 18 | 20,50% | 22 | 25,00% |         | 41            | 46,60% | 22         | 25,00% |         | 12         | 13,60% | 51       | 58,00% |         |
| overall T-Killer cells (CD8)          | low  | 23            | 26,10% | 16 | 18,20% | 5  | 5,70%  | <0,001  | 39            | 44,30% | 5          | 5,70%  | <0,001  | 6          | 6,80%  | 38       | 43,20% | 1,000   |
|                                       | high | 10            | 11,40% | 13 | 14,80% | 21 | 23,90% |         | 23            | 26,10% | 21         | 23,90% |         | 6          | 6,80%  | 38       | 43,20% |         |
| stromal T-Killer cells (CD8)          | low  | 13            | 14,80% | 13 | 14,80% | 2  | 2,30%  | 0,006   | 26            | 29,50% | 2          | 2,30%  | 0,002   | 3          | 3,40%  | 25       | 28,40% | 0,585   |
|                                       | high | 20            | 22,70% | 16 | 18,20% | 24 | 27,30% |         | 36            | 40,90% | 24         | 27,30% |         | 9          | 10,20% | 51       | 58,00% |         |
| epithelial T-Killer cells (CD8)       | low  | 16            | 18,20% | 22 | 25,00% | 12 | 13,60% | 0,04    | 38            | 43,20% | 12         | 13,60% | 0,191   | 7          | 8,00%  | 43       | 48,90% | 0,909   |
|                                       | high | 17            | 19,30% | 7  | 8,00%  | 14 | 15,90% |         | 24            | 27,30% | 14         | 15,90% |         | 5          | 5,70%  | 33       | 37,50% |         |
| overall regulatory T-cells (FoxP3)    | low  | 33            | 37,50% | 24 | 27,30% | 19 | 21,60% | 0,009   | 57            | 64,80% | 19         | 21,60% | 0,019   | 11         | 12,50% | 65       | 73,90% | 0,565   |
|                                       | high | 0             | 0,00%  | 5  | 5,70%  | 7  | 8,00%  |         | 5             | 5,70%  | 7          | 8,00%  |         | 1          | 1,10%  | 11       | 12,50% |         |
| stromal regulatory T-cells (FoxP3)    | low  | 31            | 35,20% | 24 | 27,30% | 18 | 20,50% | 0,043   | 55            | 62,50% | 18         | 20,50% | 0,027   | 11         | 12,50% | 62       | 70,50% | 0,388   |
|                                       | high | 2             | 2,30%  | 5  | 5,70%  | 8  | 9,10%  |         | 7             | 8,00%  | 8          | 9,10%  |         | 1          | 1,10%  | 14       | 15,90% |         |
| epithelial regulatory T-cells (FoxP3) | low  | 33            | 37,50% | 28 | 31,80% | 24 | 27,30% | 0,271   | 61            | 69,30% | 24         | 27,30% | 0,152   | 12         | 13,60% | 73       | 83,00% | 0,484   |
|                                       | high | 0             | 0,00%  | 1  | 1,10%  | 2  | 2,30%  |         | 1             | 1,10%  | 2          | 2,30%  |         | 0          | 0,00%  | 3        | 3,40%  |         |

Supplementary Table 6: Correlation of immunologic data with morphomolecular data in the subgroup of POLE wildtype and microsatellite stable (MSS) endometrial carcinomas



|                                       |      | Overall | Events (OS) | Events (DSS) | Events (DFS) |
|---------------------------------------|------|---------|-------------|--------------|--------------|
| overall TIL (CD3)                     | low  | 91      | 30          | 18           | 22           |
|                                       | high | 51      | 24          | 16           | 16           |
| stromal TIL (CD3)                     | low  | 63      | 19          | 12           | 16           |
|                                       | high | 79      | 35          | 22           | 22           |
| epithelial TIL (CD3)                  | low  | 30      | 8           | 4            | 8            |
|                                       | high | 112     | 46          | 30           | 30           |
| overall T-Killer cells (CD8)          | low  | 61      | 18          | 9            | 11           |
|                                       | high | 81      | 36          | 25           | 27           |
| stromal T-Killer cells (CD8)          | low  | 39      | 9           | 5            | 6            |
|                                       | high | 103     | 45          | 29           | 32           |
| epithelial T-Killer cells (CD8)       | low  | 71      | 26          | 19           | 23           |
|                                       | high | 71      | 28          | 15           | 15           |
| overall regulatory T-cells (FoxP3)    | low  | 114     | 41          | 25           | 27           |
|                                       | high | 28      | 13          | 9            | 11           |
| stromal regulatory T-cells (FoxP3)    | low  | 113     | 40          | 23           | 26           |
|                                       | high | 29      | 14          | 11           | 12           |
| epithelial regulatory T-cells (FoxP3) | low  | 137     | 50          | 31           | 26           |
|                                       | high | 5       | 4           | 3            | 2            |

Supplementary Table 7: Contexture of immunologic tumor microenvironment and survival associations

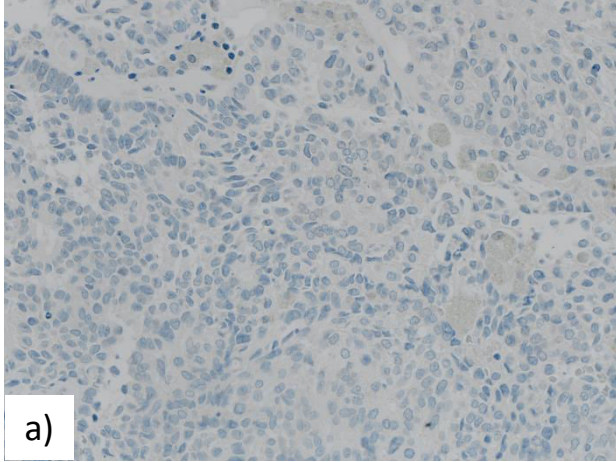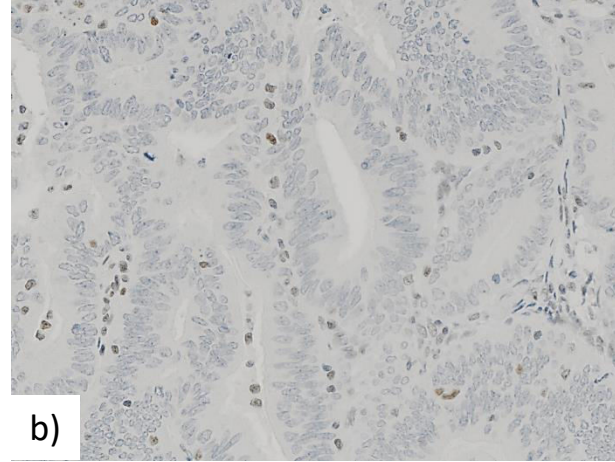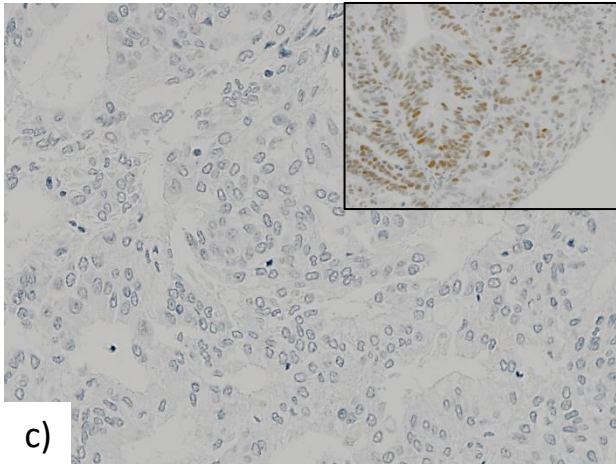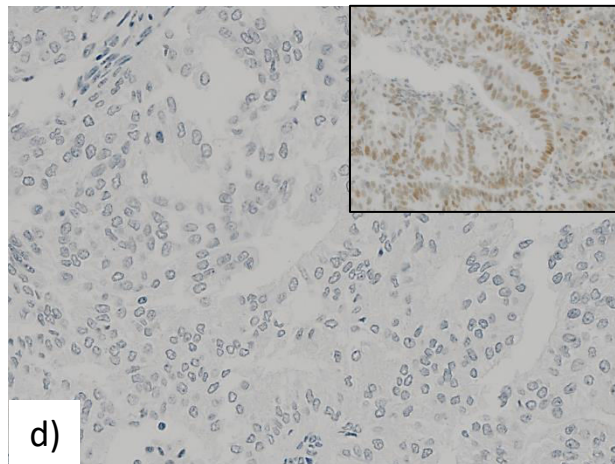

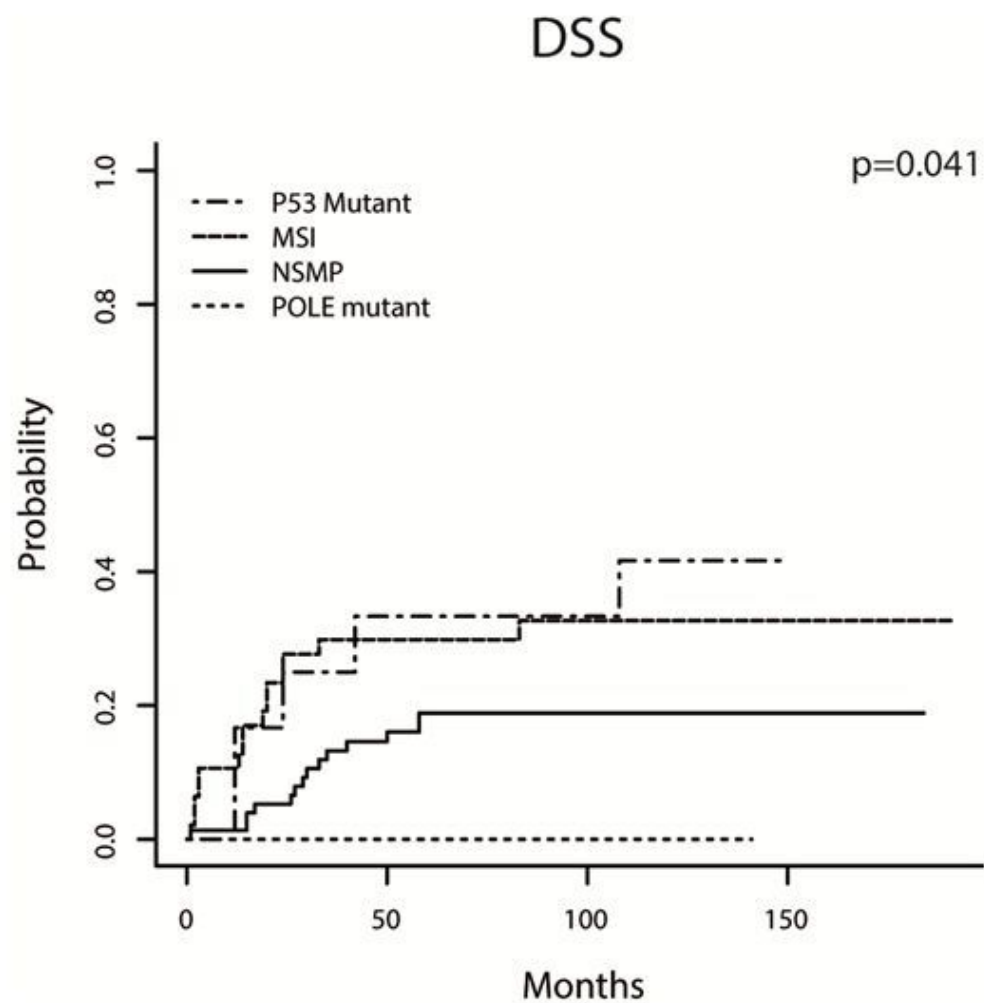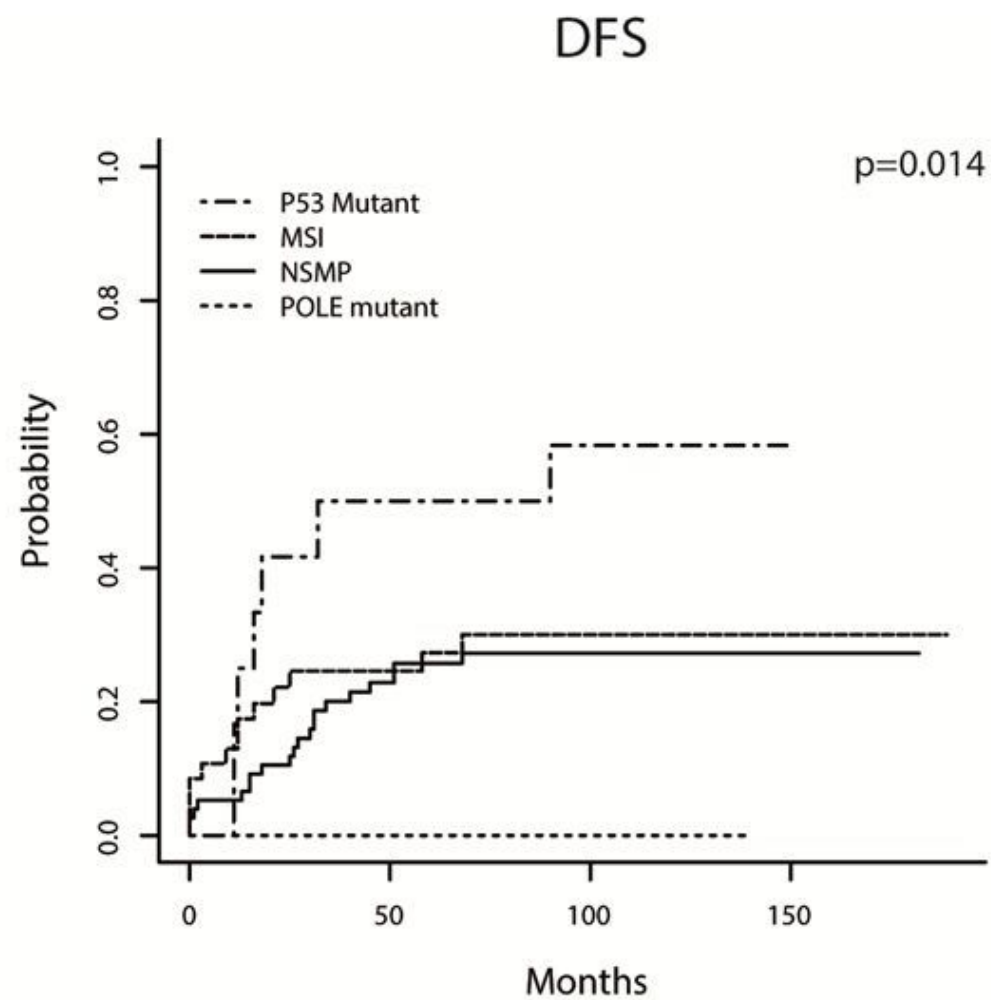

Supplementary Figure 2: Cumulative incidence function visualizing disease-specific and disease-free survival depending on molecular subgroups; a) disease-specific survival; b) disease-free survival.
